# Supplementary material
Source: Springer Nature journal article supplement (https://www.springermedizin.de/resource/supplementary/12911_2008_251_MOESM1_ESM.pdf/9527570)

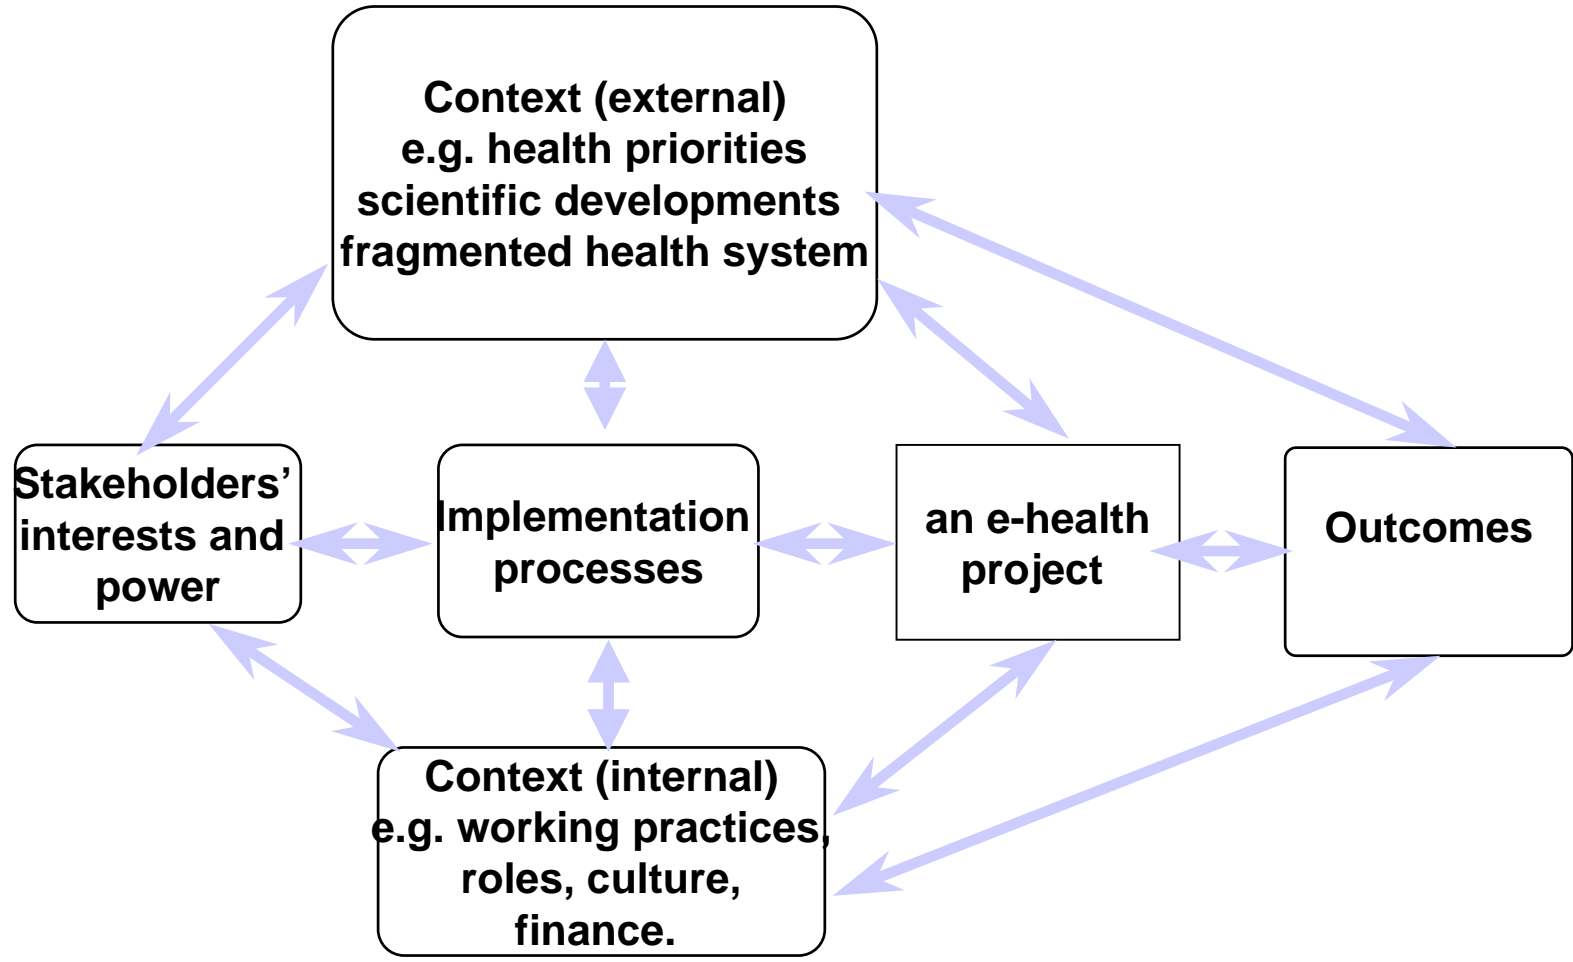

Supplement: MOESM1 [file 9527570]
